# Supplementary material for: Three-dimensional fusiform hierarchical micro/nano Li1.2Ni0.2Mn0.6O2 with a preferred orientation (110) plane as a high energy cathode material for lithium-ion batteries
Source: Royal Society of Chemistry journal article supplement (doi:10.1039/c6ta00460a), 2016-01-01
Supplement: c6ta00460a1.pdf [file c6ta00460a1.pdf]

## Supplementary Information

### **Three-Dimensional Fusiform Hierarchical Micro/Nano $\text{Li}_{1.2}\text{Ni}_{0.2}\text{Mn}_{0.6}\text{O}_2$ with Preferred Orientation (110) Plane as High Energy Cathode Material for Lithium-Ion Batteries**

Yu Li <sup>a</sup>, Ying Bai <sup>a\*</sup>, Chuan Wu <sup>a,b</sup>, Ji Qian <sup>a</sup>, Guanghai Chen <sup>a</sup>, Lu Liu <sup>a</sup>, Hui Wang <sup>a</sup>, Xingzhen Zhou <sup>a</sup>, and Feng Wu <sup>a,b</sup>

<sup>a</sup> Beijing Key Laboratory of Environmental Science and Engineering, School of Materials Science and Engineering, Beijing Institute of Technology, Beijing 100081, PR China

<sup>b</sup> Collaborative Innovation Center of Electric Vehicles in Beijing, Beijing 100081, PR China

\*Corresponding Author. E-mail address: [membrane@bit.edu.cn](mailto:membrane@bit.edu.cn)

**Table S1** Comparison of the electrochemical performance of sample LNM10 with other Li-rich cathode materials.

| Samples                                                                                                                  | Method          | Rate/Capacity(mAh g <sup>-1</sup> ) |         |         |         |       | Ref.      |
|--------------------------------------------------------------------------------------------------------------------------|-----------------|-------------------------------------|---------|---------|---------|-------|-----------|
|                                                                                                                          |                 | 0.1 C                               | 0.5 C   | 1 C     | 2 C     | 5 C   |           |
| <b>Li<sub>1.2</sub>Ni<sub>0.2</sub>Mn<sub>0.6</sub>O<sub>2</sub> (LNM10)</b><br>1 C=200mA g <sup>-1</sup>                | Hydrothermal    | 286.9                               | 258.5   | 230.5   | 188.1   | 166.8 | This work |
| <b>Li[Li<sub>0.2</sub>Mn<sub>0.54</sub>Ni<sub>0.13</sub>Co<sub>0.13</sub>]O<sub>2</sub></b><br>1 C=200mA g <sup>-1</sup> | Sol-gel         | ca. 298                             | ca. 228 | ca. 165 | ca. 135 | –     | Ref. 1    |
| <b>Li[Li<sub>1/6</sub>Fe<sub>1/6</sub>Ni<sub>1/6</sub>Mn<sub>1/2</sub>]O<sub>2</sub></b><br>1 C=200mA g <sup>-1</sup>    | Sol-gel         | 282                                 | 243.3   | 221.9   | 189.1   | –     | Ref. 2    |
| <b>Li<sub>1.5</sub>Ni<sub>0.25</sub>Mn<sub>0.75</sub>O<sub>2+d</sub></b><br>1 C=200mA g <sup>-1</sup>                    | Coprecipitation | 275                                 | ca. 220 | 211     | 194     | 159   | Ref. 3    |
| <b>Li(Li<sub>0.17</sub>Ni<sub>0.2</sub>Co<sub>0.05</sub>Mn<sub>0.58</sub>)O<sub>2</sub></b><br>1 C=200mA g <sup>-1</sup> | Solvothermal    | –                                   | 257     | 229.7   | 183.2   | 161.1 | Ref. 4    |
|                                                                                                                          | Coprecipitation | –                                   | 196.8   | 174.2   | 129.1   | 96.9  |           |

## Reference

- [1] X. Jin, Q. Xu, X. Yuan, L. Zhou, Y. Xia, *Electrochim. Acta*, 2013, **114**, 605-610.
- [2] T. Zhao, S. Chen, L. Li, X. Zhang, H. Wu, T. Wu, C.J. Sun, R. Chen, F. Wu, J. Lu, K. Amine, *ACS Appl. Mater. Interfaces*, 2014, **6**, 22305-22315.
- [3] D. Wang, I. Belharouak, G. Zhou, K. Amine, *Adv. Funct. Mater.*, 2013, **23**, 1070-1075.
- [4] F. Fu, Q. Wang, Y.P. Deng, C.H. Shen, X.X. Peng, L. Huang, S.G. Sun, *J. Mater. Chem. A*, 2015, **3**, 5197-5203.
